# Supplementary material
Source: PubMed Central journal article supplement (PMC3944070)
Supplement: NIHMS552301-supplement-1.pdf [file NIHMS552301-supplement-1.pdf]

**Fig.S1**

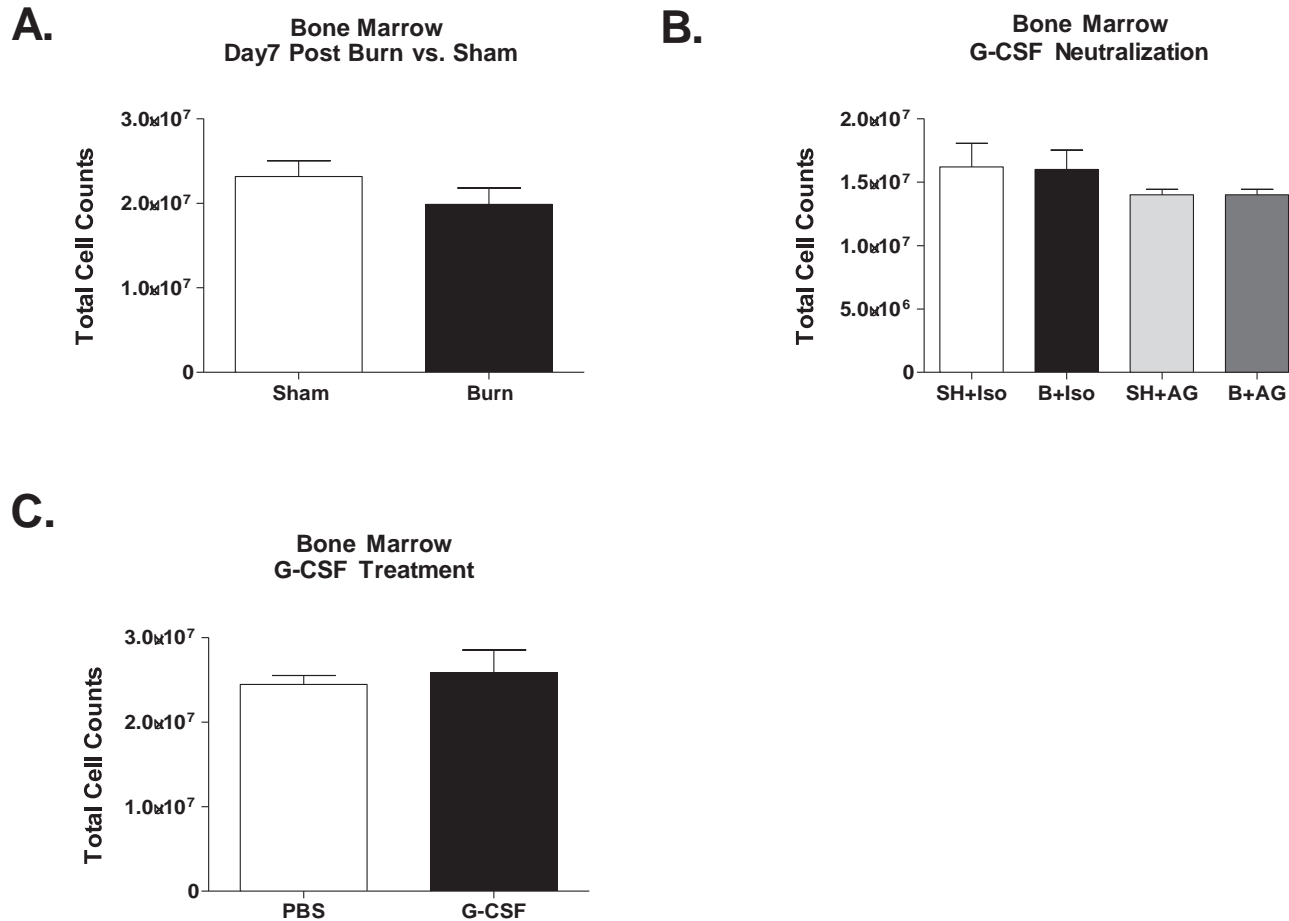

Total bone marrow cell counts do not account for differences in bone marrow composition. Bone marrow cells were collected as described in methods. Total cell counts were determined using an automated system (Hemavet®) and confirmed by manual counting using a hemocytometer. (Panel A) Total bone marrow cells in day 7 post burn and sham injured mice. (Panel B) Total bone marrow cells at day 7 post injury determined in sham isotype (SH+Iso), burn isotype (B+Iso), sham anti-G-CSF (SH+AG), burn anti-G-CSF (B+AG) treated mice. (Panel C) Total bone marrow cells determined in mice treated for six consecutive days with G-CSF or PBS and collected on day 7. Data represent mean values ±SEM for n=8/group in panel A, n=6/group in panel B, and n=4/group in panel C. Statistical significance was assessed by Student's t-test in panels A and C. In panel B an ANOVA was used to compare sham vs. burn for each antibody treatment and burn vs. burn. Statistical differences were not found in any of the comparisons.
